# Supplementary material
Source: PubMed Central journal article supplement (PMC6358704)
Supplement: pnas.1816933116.sapp.pdf [file pnas.1816933116.sapp.pdf]

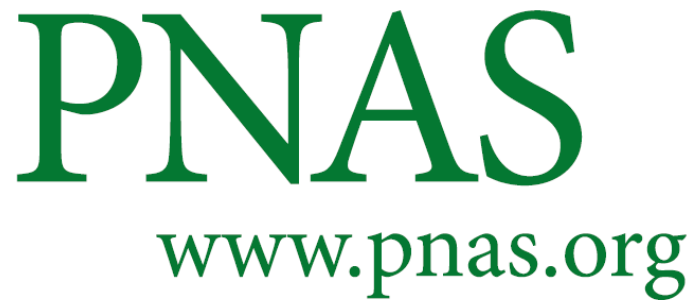

## Supplementary Information for

Human cytomegalovirus G-protein coupled receptor US28 promotes latency by attenuating c-fos

Benjamin A. Krishna, Monica S. Humby, William E. Miller, Christine M. O'Connor

Christine M. O'Connor

Email: [connoc6@ccf.org](mailto:connoc6@ccf.org)

### **This PDF file includes:**

Supplementary text  
Figs. S1 to S8  
Table S1  
References for SI reference citations

### **Other supplementary materials for this manuscript include the following:**

n/a

## Supplementary Information Text

### SI Materials and Methods

#### Cells and Viruses

Fibroblasts (primary newborn human fibroblasts, NuFF-1; GlobalStem), retinal pigmented epithelial cells (ARPE19; ATCC), THP-1 (ATCC), Kasumi-3 (ATCC), 293T (ATCC), S1/S1:MG3 murine stromal cells (described below), and CD34<sup>+</sup> hematopoietic progenitor cells (HPCs, described below) were maintained at 37°C, 5% CO<sub>2</sub>. NuFF-1 cells were maintained in Dulbecco's modified Eagle medium (DMEM), supplemented with 10% fetal bovine serum (FBS), 2 mM L-glutamine, 0.1 mM non-essential amino acids, 10 mM HEPES, and 100 U/ml each of penicillin and streptomycin. ARPE19 cells were maintained in 1:1 DMEM-HAM's medium containing 10% FBS, 2.5 mM L-glutamine, 0.5 mM sodium pyruvate, 15 mM HEPES, 1.2 g/L sodium bicarbonate, and 100 U/ml each of penicillin and streptomycin. Kasumi-3 cells were cultured in RPMI 1640 (ATCC, catalog no. 30-2001) supplemented with 20% FBS, 100 U/ml each of penicillin and streptomycin, and 100 µg/ml gentamicin at a density of  $5 \times 10^5 - 1 \times 10^6$  cells/ml. THP-1 cells were maintained at a density between  $3 \times 10^5 - 8 \times 10^5$  cells/ml in RPMI 1640 supplemented with 10% FBS and 100 U/ml each of penicillin and streptomycin. 293T cells were maintained in DMEM supplemented with 10% newborn calf serum (NCS), supplemented with 100 U/ml each of penicillin and streptomycin. M2-10B4 (MG3) and S1/S1 murine stromal were a kind gift from Dr. Donna Hogge (Terry Fox Laboratories, BC Cancer Agency, Vancouver, BC, Canada). MG3 were maintained in RPMI 1640, supplemented with 10% FBS and 100 U/ml each of penicillin and streptomycin. S1/S1 cells were maintained in Iscove's modified Dulbecco's medium (IMDM), supplemented with 10% FBS, 1 mM sodium pyruvate, and 100 U/ml each of penicillin and streptomycin. MG3 and S1/S1 were plated in a 1:1 ratio ( $\sim 1.5 \times 10^5$  cells of each cell type) onto collagen-coated (1 mg/ml) 6-well plates in human CD34<sup>+</sup> long-term culture media (hLTCM), consisting of MyeloCult H5100 (Stem Cell Technologies) supplemented with 1 µM hydrocortisone, and 100 U/ml each of penicillin and streptomycin. The following day, the cells were irradiated using a fixed source <sup>137</sup>Cesium, Shepherd Mark I Irradiator at 20 Gy. The cells were then centrifuged and resuspended in fresh hLTCM and returned to culture. Irradiated murine stromal cells were utilized the following day as feeder cells for the primary CD34<sup>+</sup> HPCs. Primary CD34<sup>+</sup> HPCs were isolated from de-identified cord blood samples (Abraham J. & Phyllis Katz Cord Blood Foundation *dba* Cleveland Cord Blood Center and Volunteer Donating Communities in Cleveland and Atlanta) by magnetic separation, as described elsewhere (1). Isolation and culture methods for the primary CD34<sup>+</sup> HPCs are detailed below.

TB40/*EmCherry* (WT), TB40/*EmCherry*-US28-3xF (US28-3xF), and TB40/*EmCherry*-US28Δ (US28Δ) are described elsewhere (2, 3). TB40/*EmCherry*-US28*comp* (US28*comp*) was generated by infecting  $2 \times 10^8$  NuFF-pBABE-US28-3xF cells (described below) with US28Δ until 100% cytopathic effect (CPE) was observed. To generate stocks of US28*comp*, cell-free virus from the infectious supernatants was then purified by ultracentrifugation through 20% sorbitol cushion after 100% CPE was observed. Virus pellets were resuspended in X-VIVO15 (Lonza) supplemented with 1.5% bovine serum albumin (BSA), and aliquots were flash-frozen in liquid nitrogen prior to long-term storage at -80°C.

TB40/*EmCherry*-US28-R129A (US28-R129A) and TB40/*EmCherry*-US28ΔN (US28ΔN) were each generated by *galK* recombineering, as previously described (4), using TB40/*EmCherry*-US28-3xF as the backbone. The primers used for *galK* insertion, the double

stranded oligonucleotides (ds oligo) used for the reversion, and the primers used to sequence verify the clones are listed in Supplemental Table S1.

Stocks of WT, US28-3xF, US28Δ, US28-R129A, and US28ΔN were generated as described previously [e.g.: ref. (5)]. All viral stocks were titrated by 50% tissue culture infectious dose (TCID<sub>50</sub>) assay on NuFF-1 and ARPE19 cells.

### **Compound treatments**

Where indicated, cells were treated with the following compounds. To differentiate THP-1 cells prior to infection, cells were treated with 20 nM 12-*O*-tetradecanoylphorbol-13-acetate TPA for 48 hours (h), and then washed twice in 1X PBS before infection. To inhibit c-fos signaling, cells were treated with T-5224 (BioVision). Cell survival in response to inhibitor treatment was performed to confirm dosage prior to experimentation (Fig S8). To determine a non-toxic concentration of the c-fos inhibitor, T-5224, we treated naïve, uninfected Kasumi-3 cells with T-5224 at varied concentrations (10, 50, and 100 nM) in X-VIVO15. Fresh media containing the inhibitor was exchanged every 2 days (d). Cell viability was assessed 7 d by live-dead discrimination using trypan blue. Cells were counted with a hemocytometer across four quadrants. For all experiments performed, cells were treated with 10 nM T-5224 (BioVision) as indicated in the text, and fresh media supplemented with the inhibitor was added every 48 h for the duration of the experiment.

### **Fluorescence activated cell sorting (FACS) selection of infected Kasumi-3 cells**

Where indicated, Kasumi-3 cells ( $5 \times 10^6$  cells/infection) were infected (moi = 1.0) with WT, US28Δ, or US28*comp*. Infected cells (mCherry-positive) were enriched by FACS 1 dpi. Cells were washed twice in 1X PBS, returned to culture in X-VIVO15, and harvested on the days indicated in the text for RT-qPCR analyses.

### **Generation of pBABE-US28-3xF and pSLIK-US28-3xF**

To generate pBABE-US28-3xF, the US28 ORF with its triple FLAG epitope tag at the C-terminus was amplified from TB40/E-*mCherry*-US28-3xF using the primers listed in Supplemental Table S1. The amplified insert and the pBABE-puro vector [a gift from Hartmut Land, Jay Morgenstern, and Bob Weinberg; Addgene, plasmid #1764; ref. (6)] were each digested with EcoRI and BamHI high fidelity enzymes in cut smart buffer (NEB), purified by ethanol precipitation, and then ligated with T4 ligase (NEB). STABL3 bacterial cells were transformed with the plasmid DNA and resulting transformants were sequenced for genomic integrity.

To generate pSLIK-US28-3xF, the US28 ORF with its triple FLAG epitope at the C-terminus was amplified from pcDNA3-US28 containing the US28 gene from VHL/E (7) and inserted into the SpeI and XbaI sites of pEN\_TmiRc3 creating pEN-US28-3xF. The tet-promoter/US28 cassette from pEN-US28-3xF was then recombined into pSLIK-Hygro using LR recombinase according to the manufacturer's recommendations. pSLIK-Hygro [Addgene plasmid # 25737; ref. (8)] and pEN\_TmiRc3 [Addgene plasmid #25748; ref. (8)] were gifts from Iain Fraser.

### **Generation of US28-3xF expressing NuFF-1**

To generate the stable NuFF-pBABE-puro and NuFF pBABE-US28-3xF lines, the vectors were transfected into Phoenix (amphotropic) cells using Fugene 6 Transfection Reagent (Promega) in serum-free DMEM according to the manufacturer's protocol and cultured overnight. The media was changed on the cultures, which were then returned to culture an additional 24 h at 32°C/5%

CO<sub>2</sub>. Media was then collected from the cultures over the next 2 d, clarified through an 0.45 µM filter, and stored at 4°C until the final day of collection, at which point the media was added to NuFF-1 cells with polybrene (4 µg/ml). After 24 h, the media was removed and the NuFF-1 cells were washed with 1X PBS and cultured in complete media, as described above. Retrovirally transduced cells were selected with puromycin (0.55 µg/ml).

### RNA and Protein Analyses

Total RNA was isolated from cells using the High Pure RNA Isolation Kit (Roche), in accordance with the manufacturer's instructions. Next, cDNA (between 250 ng and 1 µg per sample) was reverse transcribed with the TaqMan RT reagent kit (Applied Biosystems), following the manufacturer's protocol. Transcripts were quantified using equal volumes of cDNA template for RTqPCR using SYBR green PCR mix (Applied Biosystems). All samples were analyzed in triplicate and normalized to glyceraldehyde-3-phosphate dehydrogenase (*GAPDH*). To determine the ratio of *UL138/UL123*, *UL123* was first normalized to *GAPDH*, after which *UL138* was then normalized to *UL123/GAPDH* and presented as *UL138/UL123*. All primers are shown in Table S1.

The PDGF Signaling via STATs and NFκB PrimePCR Panel (BioRad) in 96-well format for the CFX Connect Real Time instrument (BioRad) was used to assess cellular gene expression regulated by pUS28 expression. To this end, THP-1-pSLIK-hygro or THP-1-pSLIK-US28-3xF cells were treated with DOX (1.0 µg/ml) for 24 h. Cells were harvested and total RNA was extracted using the Aurum total RNA mini kit (BioRad), according to the manufacturer's instructions. Equal concentrations (1.0 µg) were used in the cDNA reaction, in which RNA was reversed transcribed using the iScript cDNA synthesis kit (BioRad), according to the manufacturer's protocol. Equal volumes of the cDNA reaction were then loaded into the PrimePCR plate, in which each well contained lyophilized primers (20X) for the cellular genes included in the pathway, in addition to negative, positive, and quality controls. SsoAdvanced universal SYBR Green (BioRad) was used in the reaction, and gene expression was determined using the CFX Connect Real Time machine (BioRad) using the cycling parameters recommended for PrimePCR assay plates. The data was analyzed in CFX Manager.

pUS28 expression was detected using the FLAG epitope during infection, in THP-1-pSLIK-US28-3xF cells, or in NuFF-pBABE-US28-3xF cells. In all cases, total cell lysates were collected, lysed in RIPA buffer, and equal protein amounts, as indicated in the text, were analyzed by western blot. The detection of pUS28 incorporated into the mature viral particle in *US28comp* is described in detail elsewhere (9). In brief, infectious media was collected and pre-cleared of cellular debris twice by centrifugation (3000 x g, 4 min, room temperature), and the virus-containing media was purified by ultracentrifugation through a 20% sorbitol cushion. Viral particles were concentrated 280X in 10 mM Tris-Cl, pH 7.5, 400 mM NaCl, and 10 mM EDTA, and 1/20<sup>th</sup> of the concentrated particles were then analyzed by western blot. In all cases, proteins were denatured for 10 min at 42°C prior to SDS-PAGE separation. Antibodies used herein include: anti-IE1 [clone 1B12; ref. (10)] and anti-pp71 [clone 2H10-9; ref. (11)] both diluted at 1:100, anti-phospho-c-Fos (Ser32, Cell Signaling, 5348T), anti-c-Fos (Cell Signaling, 4384T) both diluted 1:1000, anti-tubulin (Sigma) diluted at 1:5000, anti-FLAG M2 (Sigma) diluted 1:7500, and horseradish peroxidase (HRP)-conjugated goat-anti-mouse and goat-anti-rabbit secondary antibodies (Jackson Immuno Research Labs) diluted 1:10000. Where indicated, protein expression was quantified by densitometry using Image J software (NIH).

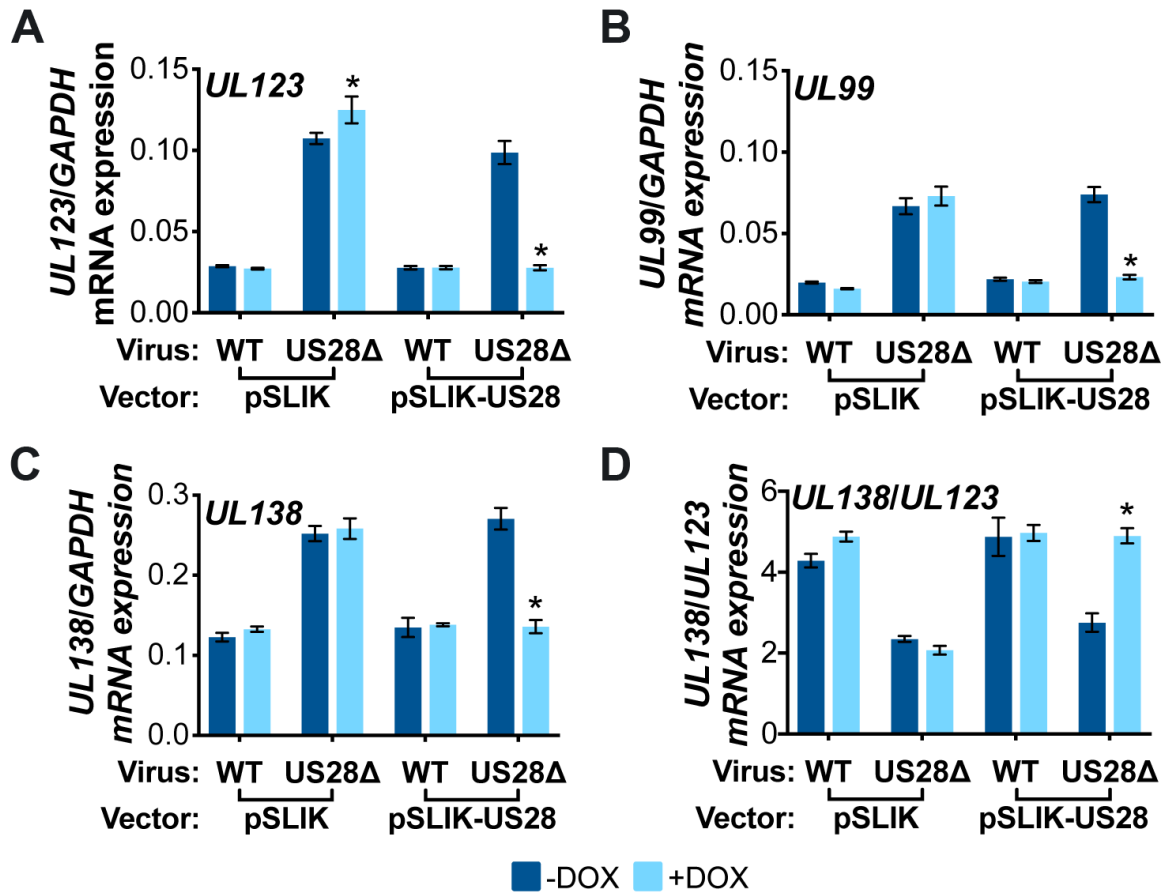

**Fig. S1. DOX treatment does not alter viral gene expression.** THP-1-pSLIK or THP-1-pSLIK-US28 were treated +/- DOX (24h) and then infected with either WT or US28Δ (moi = 1.0). Total RNA was harvested 7 dpi, and the following transcripts were assessed by RTqPCR: (A) *UL123*, (B) *UL99*, (C) *UL138*, and (D) the ratio of *UL138/UL123*. Samples were normalized to *GAPDH*, and each sample was analyzed in triplicate. Errors bars indicate standard deviation. Statistical significance was calculated using two-way ANOVA and Sidak post-hoc analysis relative to -DOX at each time point; \* $p < 0.05$

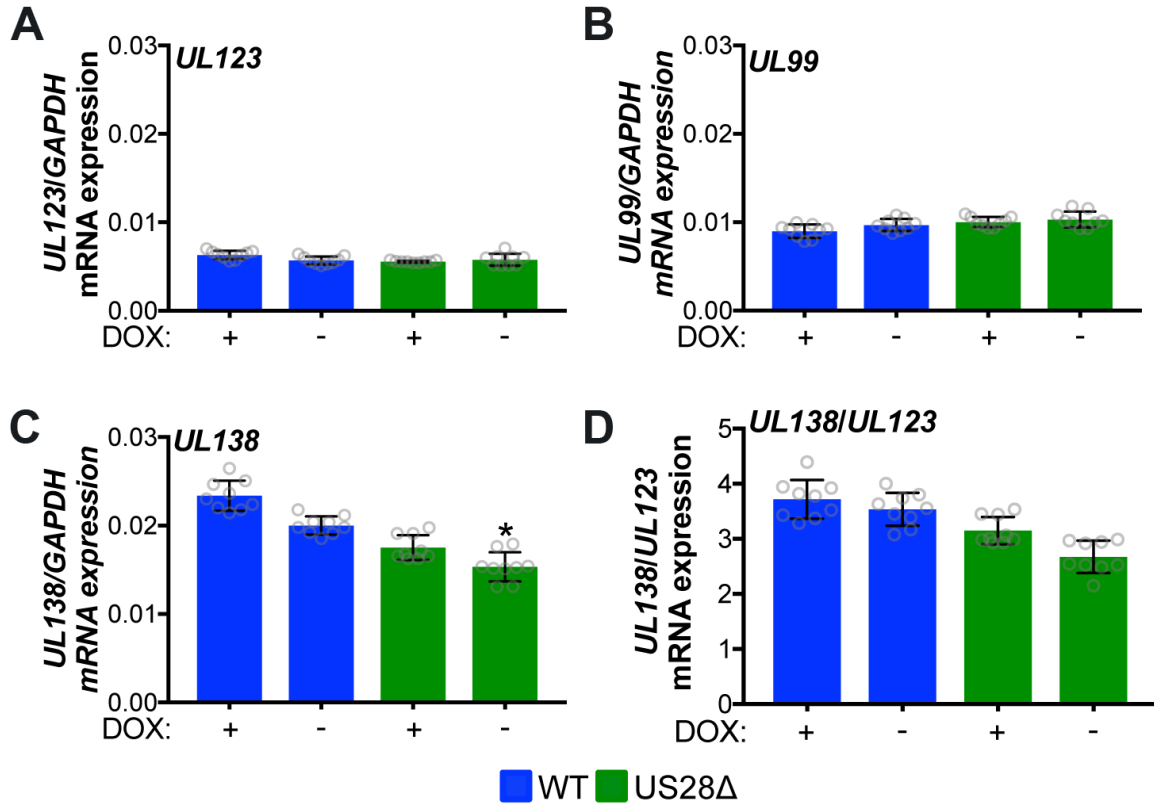

**Fig. S2. pUS28 does not suppress lytic expression in differentiated THP-1 cells.** THP-1-pSLIK-US28-3xF cells were treated with TPA (20 nM) for 48 h to promote differentiation. Cells were then treated with (+) or without (-) DOX (1  $\mu$ g/ml) for 48 h to induce pUS28 expression. Next, the cells were infected with WT (blue) or US28 $\Delta$  (green) and cultured for 7 d, during which the indicated DOX treatment was maintained. Total RNA from each culture was harvested and (A) *UL123*, (B) *UL99*, (C) *UL138*, and (D) the ratio of *UL138/UL123* gene expression were measured by RT-qPCR. Each sample was normalized to *GAPDH* and analyzed in triplicate. Errors bars indicate standard deviation; \* $p < 0.05$ , calculated using one-way ANOVA and Dunnett's post-hoc analysis.

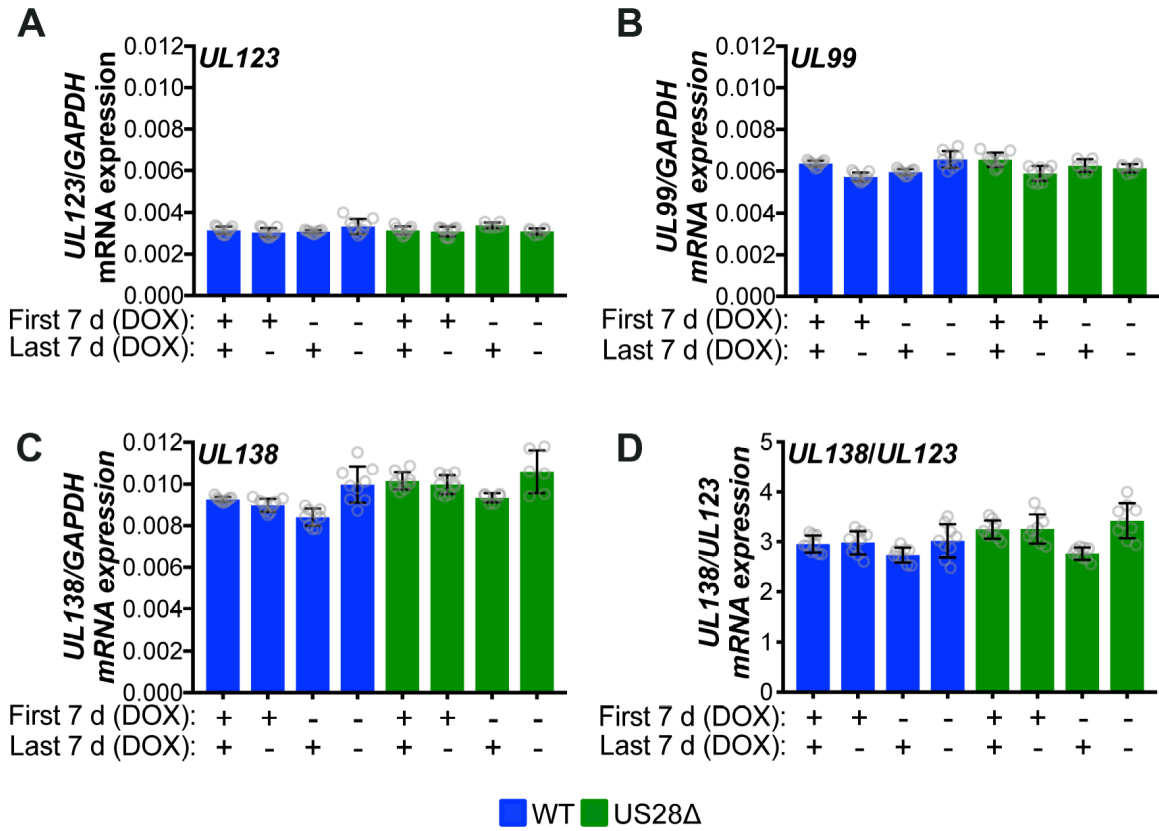

**Fig. S3. pUS28 protein does not suppress lytic gene expression at later time points post-infection in differentiated THP-1 cells.** THP-1-pSLIK-US28-3xF cells were differentiated with TPA (20 nM) for 48 h. Cells were then treated with (+) or without (-) DOX (1  $\mu$ g/ml) for an additional 48 h to induce pUS28 expression and next infected with WT (blue) or US28 $\Delta$  (green) (moi = 1.0). Cells were cultured for 7 d, during which cells were maintained under their original treatment conditions (First 7 d). At 7 dpi, cells were washed in PBS and treated with (+) or without (-) DOX (Last 7 d). Total RNA was harvested and (A) *UL123*, (B) *UL99*, (C) *UL138*, and (D) the ratio of *UL138/UL123* expression were measured by RT-qPCR. Each sample was normalized to *GAPDH* and analyzed in triplicate. Errors bars indicate standard deviation. No results were significant, as tested using one-way ANOVA and Dunnett's post-hoc analysis.

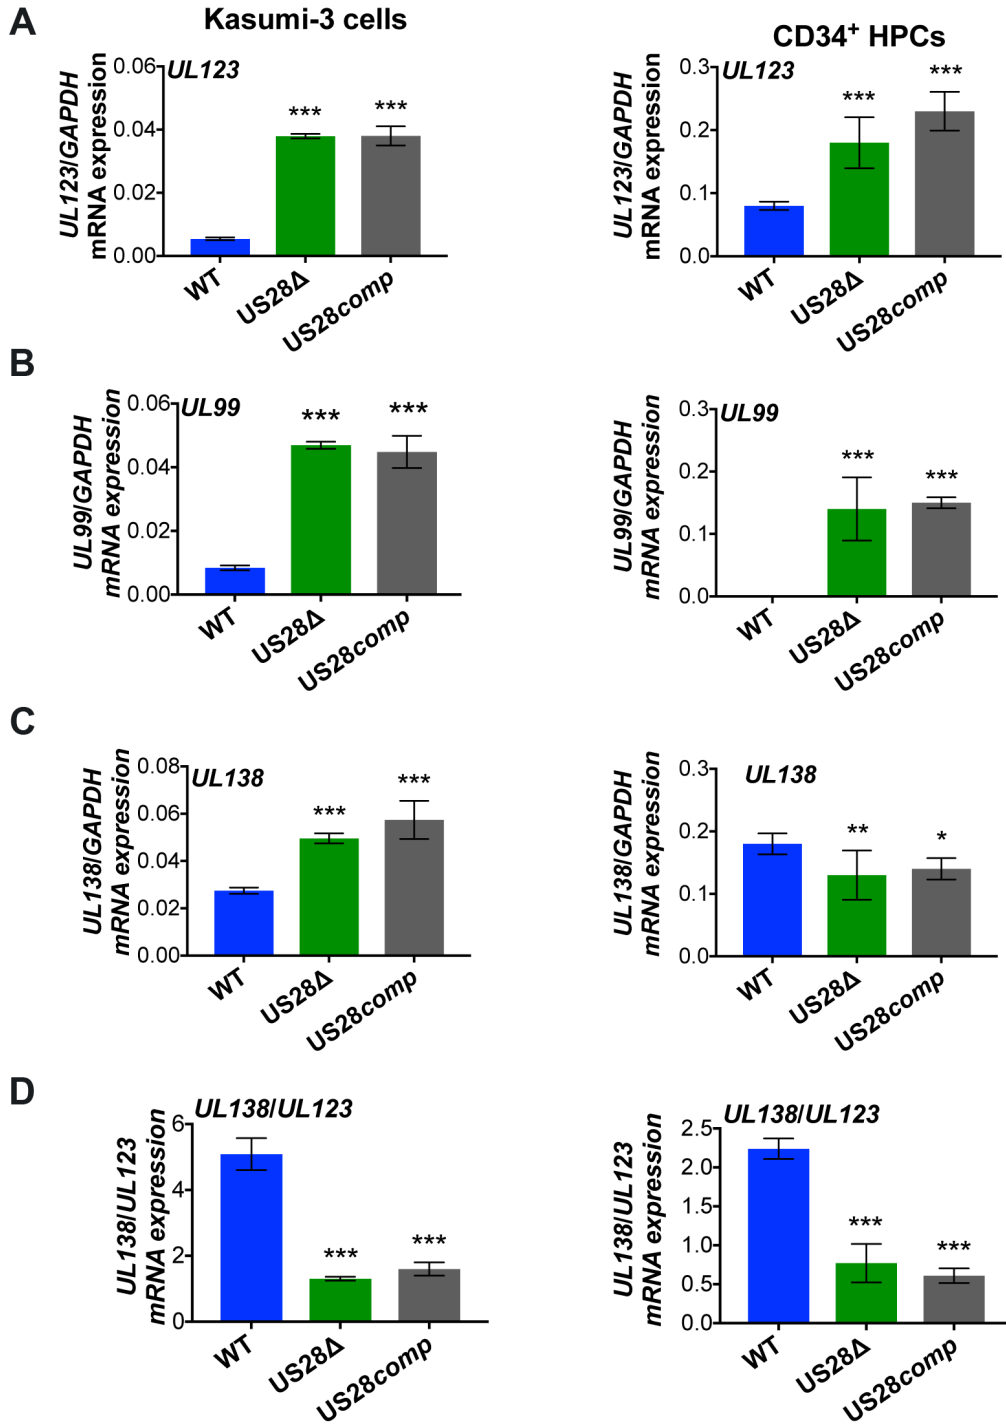

**Fig. S4. Sustained pUS28 expression is required to maintain viral latency in Kasumi-3 cells CD34<sup>+</sup> HPCs.** Kasumi-3 cells (left; moi = 1.0) or CD34<sup>+</sup> HPCs (right; moi = 2.0) were infected with WT, US28Δ, or US28comp. Cells were harvested 12 dpi and (A) *UL123*, (B) *UL99*, (C) *UL138*, and (D) the ratio of *UL138/UL123* gene expression were measured by RT-qPCR. Each sample was normalized to *GAPDH* and analyzed in triplicate. Errors bars indicate standard deviation, and statistical significance was calculated using one-way ANOVA and Dunnett's post-hoc analysis; \**p* < 0.05, \*\**p* < 0.01, \*\*\**p* < 0.001.

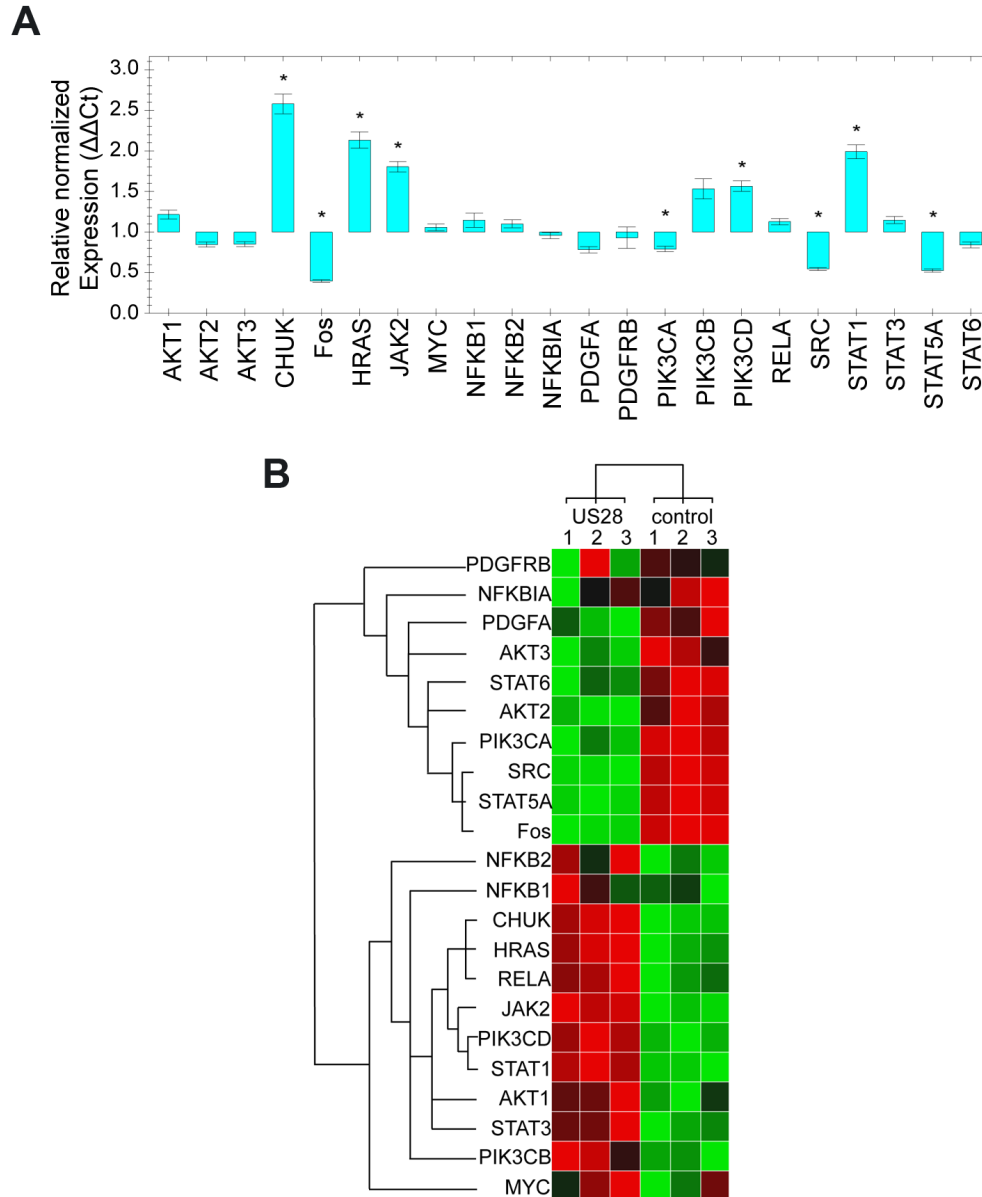

**Fig. S5. pUS28 expression reveals dysregulated cellular genes.** THP-1-pSLIK-US28-3xF (US28) or THP-1-pSLIK-hygro (control) cells were treated with DOX for 24 h, after which total RNA was harvested from each culture. Equal concentrations of RNA (1.0  $\mu$ g) were used to generate cDNA, after which an equal volume of cDNA was loaded onto PrimePCR plates. **(A)** Expression of each gene is shown as fold-change in DOX-treated THP-1-pSLIK-US28-3xF cells relative to its expression in the control cells (set to 1.0). Each sample was assessed in triplicate and normalized to *GAPDH*. Error bars represent standard deviation; \* $p < 0.001$ . **(B)** Clustergram of the replicates for each sample reveal the most significant down-regulated (green) and up-regulated (red) genes in response to pUS28 expression. Two genes (platelet derived growth factor subunit B [*PDGFB*] and platelet derived growth factor receptor alpha [*PDGFR $\alpha$* ]) were excluded from the analyses because their quantitation cycles were within three cycles of the genomic DNA control.

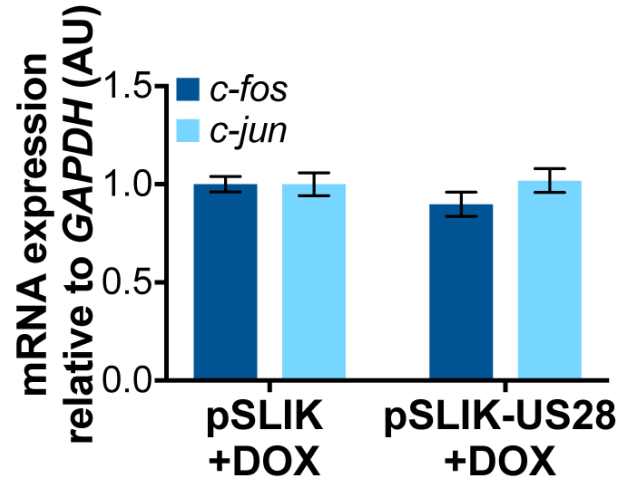

**Fig. S6. pUS28 signaling does not impact *c-fos* expression in differentiated cells that support lytic infection.** THP-1-pSLIK-hygro (pSLIK) and THP-1-pSLIK-US28-3xF (pSLIK-US28) were differentiated with TPA (20 nM) for 48 h and then treated with DOX for an additional 24 h. Cells were collected and *c-fos* (dark blue) and *c-jun* (light blue) expression were measured relative to *GAPDH*. Each sample was analyzed in triplicate. Errors bars indicate standard deviation. None of the samples were considered significant by Welch's t-test.

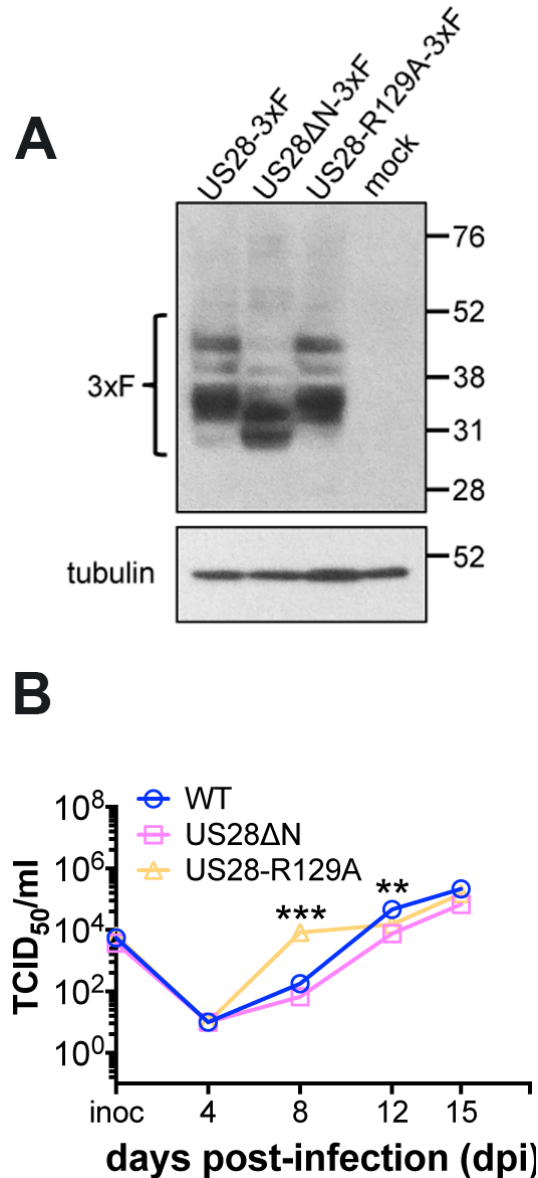

**Fig. S7. pUS28 signaling mutants are expressed and display wild type growth kinetics in fibroblasts.** (A) NuFF-1 cells were infected (moi = 0.5) for 96 h and total cell lysates were harvested for immunoblot analyses. pUS28 was detected using an antibody directed at the FLAG epitope tag. Cellular tubulin is shown as a control. (B) NuFF-1 cells were infected (moi = 0.01) with the indicated viruses, and cell-free supernatants were collected over a 15 d time course. All samples were analyzed in triplicate by TCID<sub>50</sub>. Error bars indicate standard deviation. Statistical significance was calculated using the Student's T-test; \*\* $p < 0.01$  (WT vs. US28ΔN; WT vs. US28-R129A), \*\*\* $p < 0.001$  (WT vs. US28-R129A).

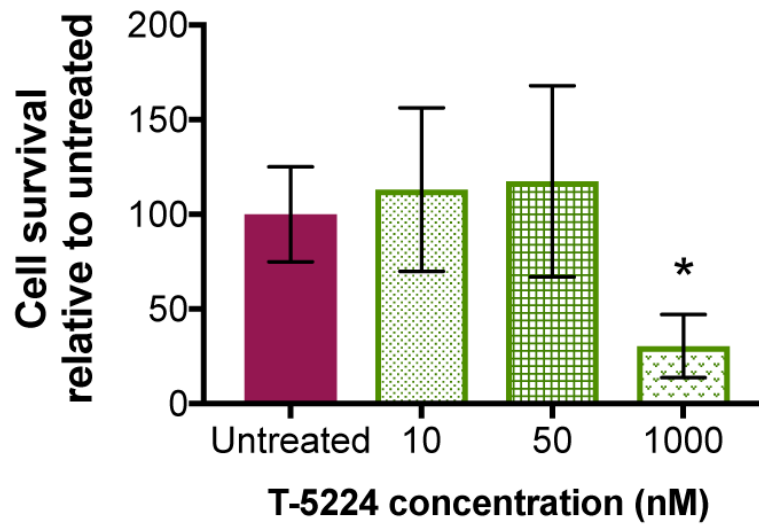

**Fig. S8.** The c-fos inhibitor, T-5224, is not toxic to Kasumi-3 cells below 50 nM. Kasumi-3 cells were treated with the c-fos inhibitor, T-5224, at the concentrations indicated. Fresh media with continued T-5224 was provided every 2 d. Cell survival was measured on day 7 by counting live cell numbers using trypan blue with a hemocytometer. Data is shown as percentage cell survival relative to untreated control. Error bars represent standard deviation, calculated using one-way ANOVA and Dunnett's post-hoc analysis; \* $p < 0.05$ .

**Table S1. Primers used in this study.**

| Primer Use         | Sequence                                                                                       | Target                     |
|--------------------|------------------------------------------------------------------------------------------------|----------------------------|
| galK insertion     | TACGTGGCTATGTTTGCCAGTTTGTGTTTTATCACGG<br>AGATTGCACTCGAT <u>CCTGTTGACAATTAATCATCGGC</u><br>A    | US28-R129 <i>AgalK</i> FWR |
| galK insertion     | AAGGCAGGCCTGTTTTACAGGCCGATATCTCATGTAA<br>ACAATAGCGTAGTATCAGCACTGTCCTGCTCCTT                    | US28-R129 <i>AgalK</i> REV |
| ds oligo           | ATGTTTGCCAGTTTGTGTTTTATCACGGAGATTGCAC<br>TCGATGCCTACTACGCTATTGTTTACATGAGATATCG<br>GCCTGTAAACAG | US28-R129A ds oligo        |
| seq (R129A)        | ATGACGCCGACGACGACGACCACGG                                                                      | US28 5' FWR                |
| seq (R129A)        | GCAGTAGCTGATGACACTGAGC                                                                         | US28 internal-2 REV        |
| galK insertion     | GCGTGGACCAGGCGGTGTCCATGCACCGAGGGCAGA<br>ACTGGTGCTACCATGCCTGTTGACAATTAATCATCGG<br>CA            | US28Δ <i>NgalK</i> FWR     |
| galK insertion     | CTTTGACTGATTAAGCACGTCGGTGAAGGTACAAGG<br>GGTTGCTCCAAGGTCTCAGCACTGTCCTGCTCCTT                    | US28Δ <i>NgalK</i> REV     |
| ds oligo           | GCGGTGTCCATGCACCGAGGGCAGAACTGGTGCTAC<br>CATGGACCTTGAGCAACTCCTTGTACCTTCACCGAC<br>GTGCTTA        | US28Δ ds oligo             |
| seq (US28ΔN)       | CCGCACATCTATTTTTGCTAATTGC                                                                      | US28 upstream FWR          |
| seq (US28ΔN)       | CGTACACGGCACGCTGGCTAGGGAG                                                                      | US28 internal REV          |
| qPCR               | GCC TTC CCT AAG ACC ACC AAT                                                                    | UL123 FWR                  |
| qPCR               | ATT TTC TGG GCA TAA GCC ATA ATC                                                                | UL123 REV                  |
| qPCR               | GTG TCC CAT TCC CGA CTC G                                                                      | UL99 FWR                   |
| qPCR               | TTC ACA ACG TCC ACC CAC C                                                                      | UL99 REV                   |
| qPCR               | GGT TCA TCG TCT TCG TCG TC                                                                     | UL138 FWR                  |
| qPCR               | CAC GGG TTT CAA CAG ATC G                                                                      | UL138 REV                  |
| qPCR               | ACC CAC TCC TCC ACC TTT GAC                                                                    | GAPDH FWR                  |
| qPCR               | CTG TTG CTG TAG CCA AAT TCG T                                                                  | GAPDH REV                  |
| qPCR               | CAG TCC AAG CGG AGA CAG AC                                                                     | Fos FWR                    |
| qPCR               | AGG TCA TCA GGG ATCTTG CAG                                                                     | Fos REV                    |
| qPCR               | TCG ACA TGG AGT CCC AGG A                                                                      | Jun FWR                    |
| qPCR               | GGC GAT TCT CTC CAG CTT CC                                                                     | Jun REV                    |
| qPCR               | AAC AGC GTG GAT GGC GTC TCC                                                                    | MIEP FWR                   |
| qPCR               | GGC ACC AAA ATC AAC GGG ACT TT                                                                 | MIEP REV                   |
| qPCR               | CTC GTC GTG TGA CAG CAG GAT G                                                                  | UL69 non-promoter region   |
| qPCR               | GAA CTA CAG CAA CTC AGC CGT TTG A                                                              | UL69 non-promoter region   |
| pBABE-US28 cloning | CGC GGA TCC GCC ACC ATG ACG CCG ACG ACG<br>ACG A                                               | US28 5' with BamH1         |
| pBABE-US28 cloning | CGC GAA TTC TTA CTT GTC GTC GTC GTC CTT GTA<br>GTC GAA TTC C                                   | US28 3' with EcoR1         |

FWR, forward primer; REV, reverse primer; seq, sequencing primer; ds oligo, double stranded oligonucleotide. Underlined sequences bind the pGalK plasmid, described elsewhere (4).

## References

1. Umashankar M & Goodrum F (2014) Hematopoietic long-term culture (hLTC) for human cytomegalovirus latency and reactivation. *Methods Mol Biol* 1119:99-112.
2. Miller WE, *et al.* (2012) US28 is a potent activator of phospholipase C during HCMV infection of clinically relevant target cells. *PLoS One* 7(11):e50524.
3. O'Connor CM & Shenk T (2011) Human cytomegalovirus pUS27 G protein-coupled receptor homologue is required for efficient spread by the extracellular route but not for direct cell-to-cell spread. *J Virol* 85(8):3700-3707.
4. O'Connor CM & Miller WE (2014) Methods for studying the function of cytomegalovirus GPCRs. *Methods Mol Biol* 1119:133-164.
5. O'Connor CM & Shenk T (2012) Human cytomegalovirus pUL78 G protein-coupled receptor homologue is required for timely cell entry in epithelial cells but not fibroblasts. *J Virol* 86(21):11425-11433.
6. Morgenstern JP & Land H (1990) Advanced mammalian gene transfer: high titre retroviral vectors with multiple drug selection markers and a complementary helper-free packaging cell line. *Nucleic Acids Res* 18(12):3587-3596.
7. Miller WE, Houtz DA, Nelson CD, Kolattukudy PE, & Lefkowitz RJ (2003) G-protein-coupled receptor (GPCR) kinase phosphorylation and beta-arrestin recruitment regulate the constitutive signaling activity of the human cytomegalovirus US28 GPCR. *J Biol Chem* 278(24):21663-21671.
8. Shin KJ, *et al.* (2006) A single lentiviral vector platform for microRNA-based conditional RNA interference and coordinated transgene expression. *Proc Natl Acad Sci U S A* 103(37):13759-13764.
9. Humby MS & O'Connor CM (2015) Human Cytomegalovirus US28 Is Important for Latent Infection of Hematopoietic Progenitor Cells. *J Virol* 90(6):2959-2970.
10. Zhu H, Shen Y, & Shenk T (1995) Human cytomegalovirus IE1 and IE2 proteins block apoptosis. *J Virol* 69(12):7960-7970.
11. Kalejta RF, Bechtel JT, & Shenk T (2003) Human cytomegalovirus pp71 stimulates cell cycle progression by inducing the proteasome-dependent degradation of the retinoblastoma family of tumor suppressors. *Mol Cell Biol* 23(6):1885-1895.
